# Supplementary material for: Fumed SiO2 modified electrolytes for quantum dot sensitized solar cells with efficiency exceeding 11% and better stability
Source: Royal Society of Chemistry journal article supplement (doi:10.1039/c6ta04570g), 2016-01-01
Supplement: c6ta04570g1.pdf [file c6ta04570g1.pdf]

## **Electronic Supplementary Information**

### **Fumed SiO<sub>2</sub> Modified Electrolytes for Quantum Dot Sensitized Solar Cells with Exceeding 11% Efficiency and Better Stability**

Huiyun Wei, Guoshuai Wang, Jiangjian Shi, Huijue Wu, Yanhong Luo, Dongmei Li\*  
and Qingbo Meng\*

Beijing Key Laboratory for New Energy Materials and Devices, Key Laboratory for Renewable Energy (CAS), Beijing National Laboratory for Condense Matter Physics, Institute of Physics, Chinese Academy of Sciences (CAS), Beijing 100190, China

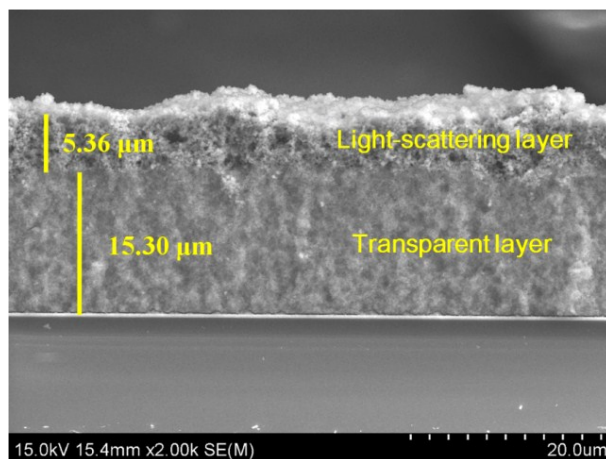

**Figure S1.** Cross-sectional SEM image of as deposited  $\text{CdSe}_x\text{Te}_{1-x}$  QD-sensitized  $\text{TiO}_2$  photoanode.

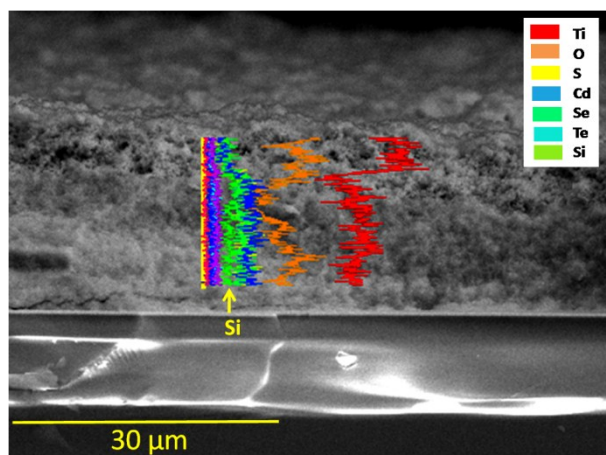

**Figure S2.** HRSEM image of cross-section of the  $\text{TiO}_2/\text{CdSe}_x\text{Te}_{1-x}$  film after soaking in  $\text{SiO}_2$  modified electrolyte and rinsing with distilled water for several times.

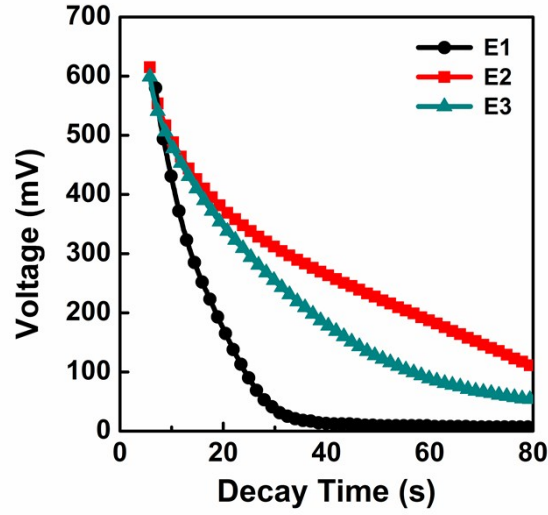

**Figure S3.** Voltage decay curves of the  $\text{CdSe}_x\text{Te}_{1-x}$  based QDSCs with different electrolytes.

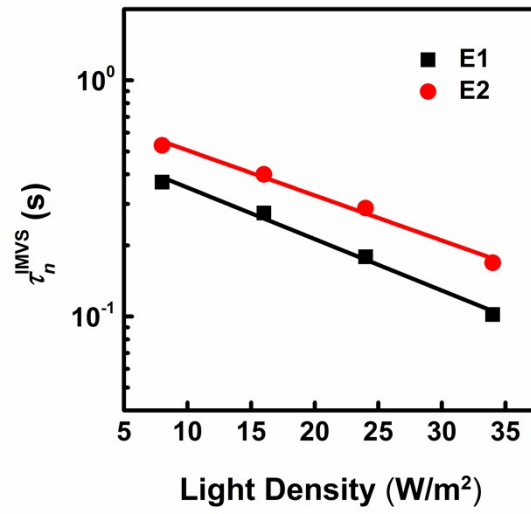

**Figure S4.** Electron lifetime ( $\tau_n^{\text{IMVS}}$ ) derived from IMVS at different light densities for  $\text{CdSe}_x\text{Te}_{1-x}$  QDSCs with different electrolytes. E1: conventional polysulfide electrolyte, E2:  $\text{SiO}_2$  NPs composite polysulfide electrolyte.
